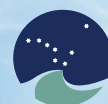

## Corrigendum

### Salmon lice-induced mortality of Atlantic salmon during post-smolt migration in Norway

Ingrid A. Johnsen<sup>1\*</sup>, Alison Harvey <sup>1</sup>, Pål Næverlid Sævik<sup>1</sup>, Anne D. Sandvik <sup>1</sup>, Ola Ugedal<sup>2</sup>, Bjørn Ådlandsvik<sup>1</sup>, Vidar Wennevik<sup>1</sup>, Kevin A. Glover<sup>1</sup>, and Ørjan Karlsen<sup>1</sup>

<sup>1</sup>Institute of Marine Research, P.B. 1870 Nordnes, Bergen, Norway

<sup>2</sup>Norwegian Institute for Nature Research, P.B. 5685 Torgarden, Trondheim, Norway

\*Corresponding author: tel: + 47 41 55 48 20; e-mail: [ingrid.johnsen@hi.no](mailto:ingrid.johnsen@hi.no).

Johnsen, I. A., Harvey, A., Sævik, P. N., Sandvik, A. D., Ugedal, O., Ådlandsvik, B., Wennevik, V., Glover, K. A., and Karlsen, Ø. Salmon lice-induced mortality of Atlantic salmon during post-smolt migration in Norway. – ICES Journal of Marine Science, 78: 1555–1555.

ICES Journal of Marine Science (2020), doi:10.1093/icesjms/fsaa202; advance access publication 18 June 2021.

In the originally published version of this manuscript, there was an error in the Discussion section. The following sentence should read: “Based on this, aquaculture-produced salmon lice-induced mortality of wild salmon post-smolts was estimated as <10% for 179 rivers, 10–30% for 140 rivers, and >30% for 82 rivers in 2019” instead of “Based on this, aquaculture-produced salmon lice-induced mortality of wild salmon post-smolts was estimated as <10% for 247 rivers, 10–30% for 122 rivers, and >30% for 32 rivers in 2019”. This error has now been corrected online.
